# Supplementary material for: The Healing Power of Clean Rivers: In Silico Evaluation of the Antipsoriatic Potential of Apiin and Hyperoside Plant Metabolites Contained in River Waters
Source: MDPI journal article supplement (doi:10.3390/ijerph19052502), 2022-02-22

## Supporting Information

### **The healing power of clean rivers: in silico evaluation of the antipsoriatic potential of apiin and hyperoside plant metabolites contained in river waters**

**Valentina Roviello<sup>¶1</sup>, Melinda Gilhen-Baker<sup>¶2</sup>, Caterina Vicidomini<sup>3</sup>, and Giovanni N. Roviello<sup>3,\*</sup>**

<sup>1</sup> Department of Chemical, Materials and Industrial Production Engineering (DICMaPI), University of Naples Federico II, Piazzale V. Tecchio 80, 80125 Naples, Italy

<sup>2</sup> Faculty of Physical Medicine and Rehabilitation, Georgian State Teaching University of Physical Education and Sport, 49, Chavchavadze avenue, 0162 Tbilisi, Georgia

<sup>3</sup> Istituto di Biostrutture e Bioimmagini IBB - CNR Mezzocannone Site and Headquarters; I-80145 Naples, Italy

\* Correspondence: giroviel@unina.it; Tel.: +39 0812534585

¶These authors contributed equally to this work.

**Table S1** Predicted chemico-physical and pharmacokinetic properties for Apiin computed by SwissADME (<http://www.swissadme.ch/index.php> accessed on 8th November 2021)

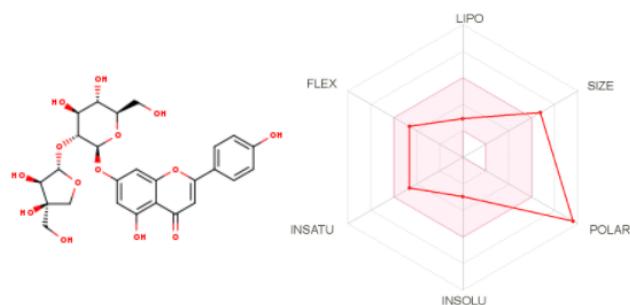

SMILES OC[C@H]1O[C@@H](Oc2cc(O)c3c(c2)oc(cc3=O)c2ccc(cc2)O)[C@@H]([C@H]([C@@H](O)O)O)[C@H]1OC[C@H]([C@H]1O)(O)CO

| Physicochemical Properties                            |                                                 |
|-------------------------------------------------------|-------------------------------------------------|
| Formula                                               | C <sub>26</sub> H <sub>28</sub> O <sub>14</sub> |
| Molecular weight                                      | 564.49 g/mol                                    |
| Num. heavy atoms                                      | 40                                              |
| Num. arom. heavy atoms                                | 16                                              |
| Fraction Csp <sup>3</sup>                             | 0.42                                            |
| Num. rotatable bonds                                  | 7                                               |
| Num. H-bond acceptors                                 | 14                                              |
| Num. H-bond donors                                    | 8                                               |
| Molar Refractivity                                    | 132.56                                          |
| TPSA <sup>2</sup>                                     | 228.97 Å <sup>2</sup>                           |
| Lipophilicity                                         |                                                 |
| Log <i>P</i> <sub>o/w</sub> (iLOGP) <sup>2</sup>      | 2.31                                            |
| Log <i>P</i> <sub>o/w</sub> (XLOGP3) <sup>2</sup>     | -0.36                                           |
| Log <i>P</i> <sub>o/w</sub> (WLOGP) <sup>2</sup>      | -1.49                                           |
| Log <i>P</i> <sub>o/w</sub> (MLOGP) <sup>2</sup>      | -3.16                                           |
| Log <i>P</i> <sub>o/w</sub> (SILICOS-IT) <sup>2</sup> | -0.72                                           |
| Consensus Log <i>P</i> <sub>o/w</sub> <sup>2</sup>    | -0.68                                           |

| Water Solubility                                         |                                               |
|----------------------------------------------------------|-----------------------------------------------|
| Log S (ESOL) <sup>2</sup>                                | -2.95                                         |
| Solubility                                               | 6.38e-01 mg/ml ; 1.13e-03 mol/l               |
| Class <sup>2</sup>                                       | Soluble                                       |
| Log S (Ali) <sup>2</sup>                                 | -3.99                                         |
| Solubility                                               | 5.83e-02 mg/ml ; 1.03e-04 mol/l               |
| Class <sup>2</sup>                                       | Soluble                                       |
| Log S (SILICOS-IT) <sup>2</sup>                          | -1.92                                         |
| Solubility                                               | 6.83e+00 mg/ml ; 1.21e-02 mol/l               |
| Class <sup>2</sup>                                       | Soluble                                       |
| Pharmacokinetics                                         |                                               |
| GI absorption <sup>2</sup>                               | Low                                           |
| BBB permeant <sup>2</sup>                                | No                                            |
| P-gp substrate <sup>2</sup>                              | Yes                                           |
| CYP1A2 inhibitor <sup>2</sup>                            | No                                            |
| CYP2C19 inhibitor <sup>2</sup>                           | No                                            |
| CYP2C9 inhibitor <sup>2</sup>                            | No                                            |
| CYP2D6 inhibitor <sup>2</sup>                            | No                                            |
| CYP3A4 inhibitor <sup>2</sup>                            | No                                            |
| Log <i>K</i> <sub>p</sub> (skin permeation) <sup>2</sup> | -10.00 cm/s                                   |
| Druglikeness                                             |                                               |
| Lipinski <sup>2</sup>                                    | No; 3 violations: MW>500, NorO>10, NHorOH>5   |
| Ghose <sup>2</sup>                                       | No; 3 violations: MW>480, WLOGP<-0.4, MR>130  |
| Veber <sup>2</sup>                                       | No; 1 violation: TPSA>140                     |
| Egan <sup>2</sup>                                        | No; 1 violation: TPSA>131.6                   |
| Muegge <sup>2</sup>                                      | No; 3 violations: TPSA>150, H-acc>10, H-don>5 |
| Bioavailability Score <sup>2</sup>                       | 0.17                                          |
| Medicinal Chemistry                                      |                                               |
| PAINS <sup>2</sup>                                       | 0 alert                                       |
| Brenk <sup>2</sup>                                       | 0 alert                                       |
| Leadlikeness <sup>2</sup>                                | No; 1 violation: MW>350                       |
| Synthetic accessibility <sup>2</sup>                     | 6.08                                          |

**Table S2** Predicted chemico-physical and pharmacokinetic properties for Hyperoside computed by SwissADME (<http://www.swissadme.ch/index.php> accessed on 8th November 2021)

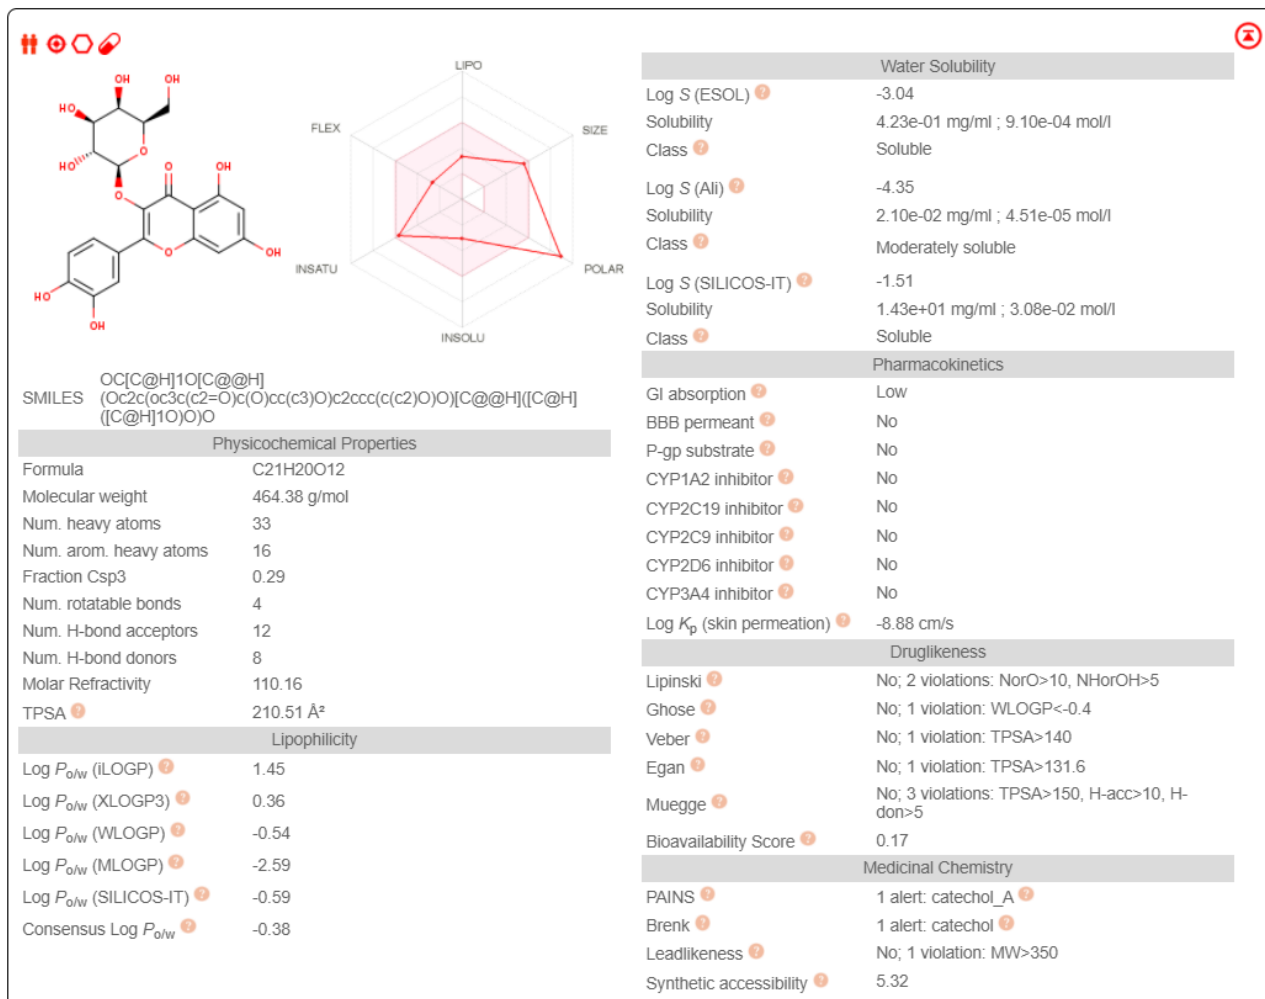

Supplement: s1 [file s1]
